# Supplementary material for: Prognostic significance of senescence-related tumor microenvironment genes in head and neck squamous cell carcinoma
Source: Aging (Albany NY). 2023 Dec 21;16(2):985–1001. doi: 10.18632/aging.205346 (PMC10866405; doi:10.18632/aging.205346)
Supplement: Supplementary Table 1 [file aging-16-205346-s001.xlsx]

## Sheet: senescence_tme_core_gene_91
Supplementary Table 1. 91 prognostic senescence related TME genes
	x
1	ABCB4
2	ADAM33
3	AGT
4	APOD
5	ASNS
6	BIRC3
7	BLK
8	CBLB
9	CCL11
10	CD19
11	CD27
12	CD38
13	CD79A
14	CD7
15	CDKN2A
16	CLEC10A
17	COL8A2
18	CRTAM
19	CTLA4
20	CXCL10
21	CXCL13
22	CXCL9
23	CXCR5
24	DUSP5
25	EDA2R
26	EGFL6
27	EOMES
28	EPDR1
29	FASLG
30	FCRL3
31	FCRL5
32	FCRLA
33	FGF7
34	FOXP3
35	FRZB
36	FSCN1
37	GNG7
38	GZMB
39	HLA-DOB
40	ICOS
41	IDO1
42	IFNG
43	IGF2BP2
44	IL21R
45	IL2RA
46	IL4I1
47	IL6
48	INHBA
49	ITGA4
50	ITGA5
51	LAG3
52	LPL
53	LYZ
54	MS4A1
55	MYO1G
56	NT5E
57	OLR1
58	P4HA1
59	PACSIN1
60	PARP14
61	PIK3R1
62	PLA2G2D
63	PLAU
64	POU2AF1
65	PPARG
66	PRF1
67	PTPN7
68	SEC61G
69	SELL
70	SERPINH1
71	SFXN3
72	SIRPG
73	SOCS1
74	SPIB
75	SPOCK1
76	TBX21
77	TBX3
78	TCL1A
79	TGFBI
80	TIGIT
81	TINAGL1
82	TMEM156
83	TNFRSF12A
84	TNFRSF25
85	TNFRSF4
86	TNFRSF8
87	TRAF1
88	VCAM1
89	VEGFC
90	ZBP1
91	ZBTB32
